# Supplementary material
Source: PubMed Central journal article supplement (PMC7489294)
Supplement: NIHMS1626980-supplement-Supplementary_Materials.pdf [file NIHMS1626980-supplement-Supplementary_Materials.pdf]

# Supporting Information

## Top-Down Analysis of In-Source HDX of Native Protein Ions

Nawaporn Sanguantrakun<sup>1,2\*</sup>; Chamnongsak Chanthamontri<sup>2,3\*</sup>; Michael L. Gross<sup>2</sup>

<sup>1</sup>Department of Basic Sciences, St. Louis College of Pharmacy, St. Louis, MO 63110

<sup>2</sup>Department of Chemistry, Washington University in St. Louis, St. Louis, MO 63130

<sup>3</sup>Millipore Sigma, 2909 Laclede Avenue, St. Louis, MO 63103

[Nawaporn.Sanguantrakun@stlcop.edu](mailto:Nawaporn.Sanguantrakun@stlcop.edu)

Correspondence to: Nawaporn Sanguantrakun; e-mail: [Nawaporn.Sanguantrakun@stlcop.edu](mailto:Nawaporn.Sanguantrakun@stlcop.edu)

Nawaporn Sanguantrakun and Chamnongsak Chanthamontri contributed equally to this work.

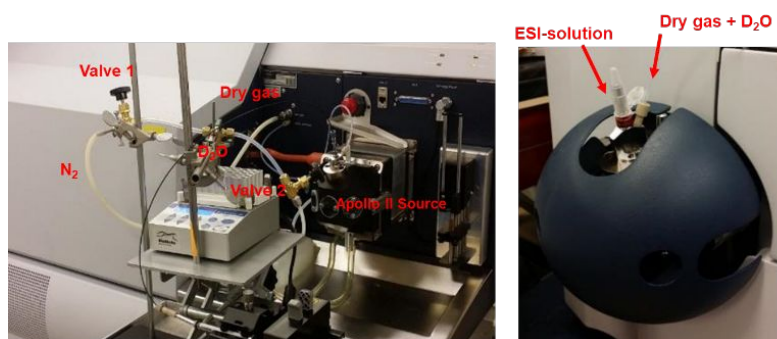

Figure S1. Pictures and Schematic of modified gas inlet system.

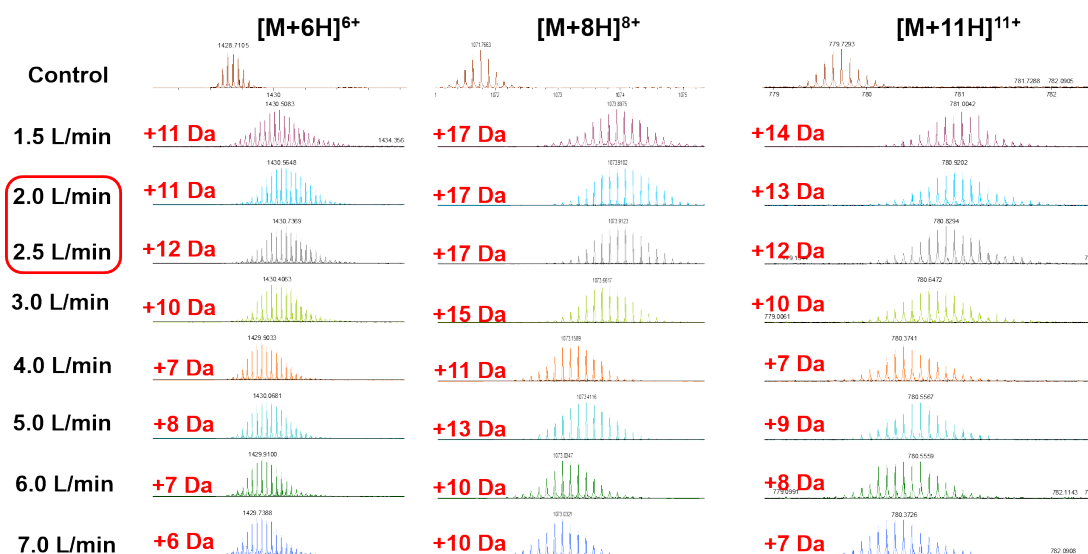

Figure S2. Effect of dry gas ( $N_2$ ) flow rate on HDX of ubiquitin.

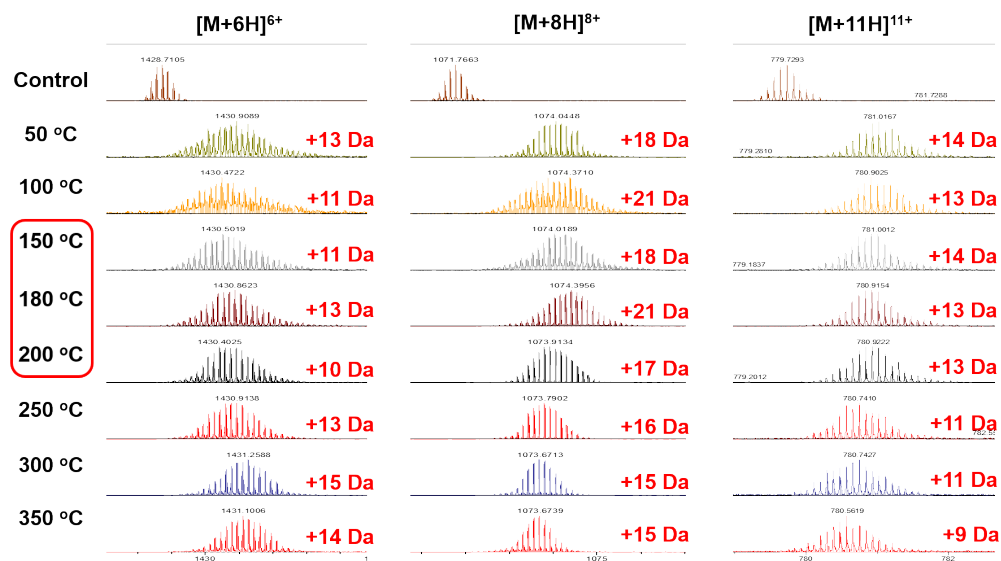

Figure S3. Effect of dry gas (N<sub>2</sub>) temperature on HDX of ubiquitin.

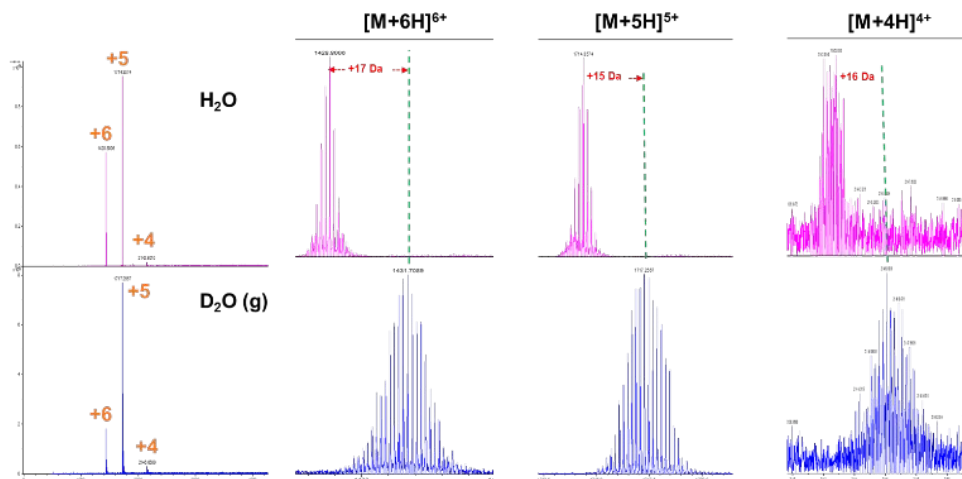

Figure S4. Deuterium uptake as a function of charge state of native ubiquitin ions. There is no difference in solvent accessibility of different charge states of native ubiquitin.
